# Supplementary material for: A Technology for Developing Synbodies with Antibacterial Activity
Source: PLoS One. 2013 Jan 23;8(1):e54162. doi: 10.1371/journal.pone.0054162 (PMC3553175; doi:10.1371/journal.pone.0054162)
Supplement: Table S2 — Kill curve kinetic studies of S. aureus binding peptide, inhibitory peptide, and synbody. (DOCX) [file pone.0054162.s005.docx]

**Table S2.** Kill curve kinetic studies of *S. aureus* binding peptide, inhibitory peptide, and synbody.

|  |  | **CFU/mL at indicated time (hr)** | | | | | | |
| --- | --- | --- | --- | --- | --- | --- | --- | --- |
| **Compound** | **Conc.** | **0** | **0.5** | **2** | **4** | **6** | **9** | **24** |
| Kanamycin | Cells Only | 4.8x107 | 1.5x108 | 2.3x108 | 8.8x108 | 3.1x109 | 4.6x109 | 6.8x109 |
|  | MIC | 4.8x107 | 1.6x106 | 3.2x107 | 1.6x106 | 1a | 8.3x106 | 1a |
|  | 2 x MIC | 4.8x107 | 1.6x106 | 5.8x106 | 1a | 1a | 1a | 1a |
|  | 4 x MIC | 4.8x107 | 4.7x106 | 1a | 1a | 1a | 1a | 1a |
|  |  |  |  |  |  |  |  |  |
| Peptide DR | Cells Only | 4.8x107 | 1.5x108 | 2.3x108 | 8.8x108 | 3.1x109 | 4.6x109 | 6.8x109 |
|  | 25 µM | 4.8x107 | 1.2x108 | 1.6x108 | 8.8x108 | 1.7x109 | 3.2x109 | 5.3x109 |
|  | 50 µM | 4.8x107 | 3.2x108 | 5.3x108 | 5.4x108 | 2.4x109 | 2.2x109 | 3.9x109 |
|  | 100 µM | 4.8x107 | 7.0x107 | 1.2x109 | 6.0x108 | 2.1x109 | 2.0x109 | 5.6x109 |
|  |  |  |  |  |  |  |  |  |
| Peptide RW | Cells Only | 4.8x107 | 1.5x108 | 2.3x108 | 8.8x108 | 3.1x109 | 4.6x109 | 6.8x109 |
|  | 25 µM | 4.8x107 | 4.5x107 | 1.5x108 | 1.0x109 | 1.7x109 | 2.4x109 | 4.4x109 |
|  | 50 µM | 4.8x107 | 3.2x107 | 1.0x108 | 7.2x108 | 2.0x109 | 2.4x109 | 3.8x109 |
|  | 100 µM | 4.8x107 | 7.2x106 | 5.1x107 | 2.5x108 | 1.4x109 | 3.4x109 | 2.7x109 |
|  |  |  |  |  |  |  |  |  |
| Synbody | Cells Only | 4.8x107 | 1.5x108 | 2.3x108 | 8.8x108 | 3.1x109 | 4.6x109 | 6.8x109 |
|  | 12.5 µM | 4.8x107 | 8.1x107 | 1.3x108 | 3.9x108 | 2.2x109 | 2.7x109 | 5.4x109 |
|  | 25 µM | 4.8x107 | 8.7x107 | 2.0x107 | 2.9x108 | 1.6x109 | 2.7x109 | 3.7x109 |
|  | 50 µM | 4.8x107 | 1.8x107 | 4.9x107 | 1.8x108 | 1.1x109 | 2.6x109 | 3.3x109 |

1a = indicates bactericidal result (>3 log10 reduction)
